# Supplementary material
Source: HighWire-hosted journal article supplement (https://erj.ersjournals.com/content/54/2/1802126)
Supplement: inline-supplementary-material-2 [file inline-supplementary-material-2.pdf]

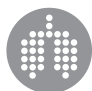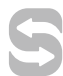

SHAREABLE PDF

# Donor human leukocyte antigen-G single nucleotide polymorphisms are associated with post-lung transplant mortality

Julieta Lazarte<sup>1,2</sup>, Jin Ma<sup>3</sup>, Tereza Martinu<sup>1</sup>, Liran Levy<sup>1</sup>, William Klement<sup>1</sup>, Matthew White<sup>1</sup>, Jacob Pelling<sup>1</sup>, Zehong Guan<sup>1</sup>, Sassan Azad<sup>1</sup>, Jussi Tikkanen<sup>1</sup>, Vivek Rao<sup>2</sup>, George Tomlinson<sup>3</sup>, Diego Delgado<sup>2</sup>, Shaf Keshavjee<sup>1</sup> and Stephen C. Juvet<sup>1</sup>

**Affiliations:** <sup>1</sup>Toronto Lung Transplant Program, Toronto General Hospital, Toronto, ON, Canada. <sup>2</sup>Cardiac Transplant Program, Toronto General Hospital, Toronto, ON, Canada. <sup>3</sup>University Health Network, University of Toronto, Toronto, Canada.

**Correspondence:** Stephen C. Juvet, Toronto General Hospital, 200 Elizabeth Street, Room 11 PMB 126, Toronto, ON, M5G 2C4, Canada. E-mail: [stephen.juvet@uhn.ca](mailto:stephen.juvet@uhn.ca)

 @ERSpublications

This largest-ever study on HLA-G SNPs and their relationship to transplant outcomes recognises the role of lung donor HLA-G SNPs on allograft HLA-G expression and outcomes post lung transplantation, a factor previously ignored <http://bit.ly/2VZURhm>

**Cite this article as:** Lazarte J, Ma J, Martinu T, *et al.* Donor human leukocyte antigen-G single nucleotide polymorphisms are associated with post-lung transplant mortality. *Eur Respir J* 2019; 54: 1802126 [<https://doi.org/10.1183/13993003.02126-2018>].

This single-page version can be shared freely online.

**ABSTRACT** Human leukocyte antigen (HLA)-G is a non-classical HLA that inhibits immune responses. Its expression is modified by single nucleotide polymorphisms (SNPs), which are associated with transplant outcomes. Our aim was to investigate the association of donor and recipient HLA-G SNPs with chronic lung allograft dysfunction (CLAD) and mortality after lung transplantation.

In this single-centre study, we examined 11 HLA-G SNPs in 345 consecutive recipients and 297 donors of a first bilateral lung transplant. A multivariable Cox proportional hazards model assessed associations of SNPs with death and CLAD. Transbronchial biopsies (TBBx) and bronchoalveolar lavage (BAL) samples were examined using quantitative PCR, ELISA and immunofluorescence.

Over a median of 4.75 years, 142 patients (41%) developed CLAD; 170 (49%) died. Multivariable analysis revealed donor SNP +3142 (GG+CG *versus* CC) was associated with increased mortality (hazard ratio 1.78, 95% CI 1.12–2.84; *p*=0.015). In contrast, five donor SNPs, -201(CC), -716(TT), -56(CC), G\*01:03(AA) and 14 bp INDEL, conferred reduced mortality risk. Specific donor–recipient SNP pairings reduced CLAD risk. Predominantly epithelial HLA-G expression was observed on TBBx without rejection. Soluble HLA-G was present in higher concentrations in the BAL samples of patients who later developed CLAD.

Specific donor SNPs were associated with mortality risk after lung transplantation, while certain donor–recipient SNP pairings modulated CLAD risk. TBBx demonstrated predominantly epithelial, and therefore presumably donor-derived, HLA-G expression in keeping with these observations. This study is the first to demonstrate an effect of donor HLA-G SNPs on lung transplantation outcome.
